# Supplementary material for: Machine Learning-Enhanced Engineering of Ultrahigh-Loading Polymer-Drug Assemblies with Programmable ROS-Triggered Release for Tumor Elimination
Source: Research Square preprint supplement (doi:10.21203/rs.3.rs-8507915/v1), 2026-02-03
Supplement: Supplementary file 2 [file f61191b6dee72656ec9d0ac7.xlsx]

## Sheet: Dataset
			Drug Term/Feature					Combination/Interaction Terms					Ion-Pairing Samples
			Polymer Term/Feature					Optimized (Loading) Terms
		Drug pi wt.%	Mw	Hydrogen bond donor count	Hydrogen bond acceptor count	Net Drug Hbond Acceptors (Hbond acc - H bond donors)	Net Drug Hbond Acceptors-donors / Mw	FSP3	Topological polar surface area	Polarizability	Molar refractivity	Atom count	Heavy atom count	Asymmetric atom count	Rotatable bond count	Ring count	Aromatic ring count	Hetero ring count	pKa - Strongest Basic (ChemAxon or drugbank)	pKa - Strongest Acid (ChemAxonor drugbank)	Predicted Drug Log D (pH 7.4)(ChemAxon)	Drug Log P	Drug Predicted Log P (Chemicalize)	HLB	Complexity	Physiological Charge (drugbank)	aqueous Solubility [mg/mL] (drugbank)	Log S (drug bank)	Van der Waals volume	Van der Waals surface area	Solvent accessible surface area	Topological polar surface area	Minimum projection area	Maximum projection area	Minimum projection radius	Maximum projection radius	tPSA (ChemDraw)	CMR (chemDraw)	Number of aromatic rings per polymer chain	Number of H bond donors per hydrophobic polymer block	Number of H bond acceptors per hydrophobic polymer block	No.of strong Hbond acceptors (e.g., tertiary amides) in hydrophobic block	No. of weak H bond acceptors (ethers/esters) in hydrophobic block	N Hbond donors per hydrophobic block / hydrophobic block Mw	N Hbond acc per hydrophobic block / hydrophobic block Mw	No.of strong Hbond acceptors (e.g., tertiary amides) in hydrophobic block / Mw of hyd block	No. of weak H bond acceptors (ethers/esters) in hydrophobic block / hyd block Mw	polymer pi%	pi interaction term (drug pi% x polymer pi%)
100%B	Cyclosporin A	0	1202.6	5	12	7	0.00582067	0.79	278.8	127.97	327.14	196	85	12	15	1	0	1	-2.4	11.83	3.64	1.4	3.638	58.377	2330	0	0.027	-5.1	1218.56	2038.91	1386.56	278.8	148.81	259.61	9.45	11.71	278.8	33.3317	16	0	16	0	16	0	0.00533333	0	0.00533333	43.3	0
90%B		0	1202.6	5	12	7	0.00582067	0.79	278.8	127.97	327.14	196	85	12	15	1	0	1	-2.4	11.83	3.64	1.4	3.638	58.377	2330	0	0.027	-5.1	1218.56	2038.91	1386.56	278.8	148.81	259.61	9.45	11.71	278.8	33.3317	15	3.4	18	0	15	0.001	0.006	0	0.005	39	0
80%B		0	1202.6	5	12	7	0.00582067	0.79	278.8	127.97	327.14	196	85	12	15	1	0	1	-2.4	11.83	3.64	1.4	3.638	58.377	2330	0	0.027	-5.1	1218.56	2038.91	1386.56	278.8	148.81	259.61	9.45	11.71	278.8	33.3317	13.3	6.7	20	0	13.3	0.00223333	0.00666667	0	0.00443333	34.4	0
70%B		0	1202.6	5	12	7	0.00582067	0.79	278.8	127.97	327.14	196	85	12	15	1	0	1	-2.4	11.83	3.64	1.4	3.638	58.377	2330	0	0.027	-5.1	1218.56	2038.91	1386.56	278.8	148.81	259.61	9.45	11.71	278.8	33.3317	11.7	10.4	21.7	0	11.7	0.00333333	0.00723333	0	0.0039	30.3	0
60%B		0	1202.6	5	12	7	0.00582067	0.79	278.8	127.97	327.14	196	85	12	15	1	0	1	-2.4	11.83	3.64	1.4	3.638	58.377	2330	0	0.027	-5.1	1218.56	2038.91	1386.56	278.8	148.81	259.61	9.45	11.71	278.8	33.3317	10	14.6	23.3	0	10	0.00443333	0.00776667	0	0.00333333	26	0
50%B		0	1202.6	5	12	7	0.00582067	0.79	278.8	127.97	327.14	196	85	12	15	1	0	1	-2.4	11.83	3.64	1.4	3.638	58.377	2330	0	0.027	-5.1	1218.56	2038.91	1386.56	278.8	148.81	259.61	9.45	11.71	278.8	33.3317	8.3	17.7	25	0	8.3	0.00556667	0.00833333	0	0.00276667	21.7	0
40%B		0	1202.6	5	12	7	0.00582067	0.79	278.8	127.97	327.14	196	85	12	15	1	0	1	-2.4	11.83	3.64	1.4	3.638	58.377	2330	0	0.027	-5.1	1218.56	2038.91	1386.56	278.8	148.81	259.61	9.45	11.71	278.8	33.3317	6.7	19	26.7	0	6.7	0.00666667	0.0089	0	0.00223333	17.3	0
30%B		0	1202.6	5	12	7	0.00582067	0.79	278.8	127.97	327.14	196	85	12	15	1	0	1	-2.4	11.83	3.64	1.4	3.638	58.377	2330	0	0.027	-5.1	1218.56	2038.91	1386.56	278.8	148.81	259.61	9.45	11.71	278.8	33.3317	5	20.4	28.3	0	5	0.00776667	0.00943333	0	0.00166667	13	0
PPS		0	1202.6	5	12	7	0.00582067	0.79	278.8	127.97	327.14	196	85	12	15	1	0	1	-2.4	11.83	3.64	1.4	3.638	58.377	2330	0	0.027	-5.1	1218.56	2038.91	1386.56	278.8	148.81	259.61	9.45	11.71	278.8	33.3317	0	0	0	0	0	0	0	0	0	0	0
PLA		0	1202.6	5	12	7	0.00582067	0.79	278.8	127.97	327.14	196	85	12	15	1	0	1	-2.4	11.83	3.64	1.4	3.638	58.377	2330	0	0.027	-5.1	1218.56	2038.91	1386.56	278.8	148.81	259.61	9.45	11.71	278.8	33.3317	0	0	28	0	28	0	0.0028	0	0.014	0	0
PLGA		0	1202.6	5	12	7	0.00582067	0.79	278.8	127.97	327.14	196	85	12	15	1	0	1	-2.4	11.83	3.64	1.4	3.638	58.377	2330	0	0.027	-5.1	1218.56	2038.91	1386.56	278.8	148.81	259.61	9.45	11.71	278.8	33.3317	0	0	154	0	154	0	0.077	0	0.0154	0	0
Pluronic		0	1202.6	5	12	7	0.00582067	0.79	278.8	127.97	327.14	196	85	12	15	1	0	1	-2.4	11.83	3.64	1.4	3.638	58.377	2330	0	0.027	-5.1	1218.56	2038.91	1386.56	278.8	148.81	259.61	9.45	11.71	278.8	33.3317	0	0	65	0	65	0	0.0166667	0	0.0171053	0	0
100%B	Pyrene	100	202.256	0	0	0	0	0	0	30.03	66.72	26	16	0	0	4	4	0	-1.3	43	4.28	4.88	4.284	1.512	217	0	0.128	-6.94	184.13	279.09	352.25	0	28.99	71.55	4.73	5.72	0	6.8564	16	0	16	0	16	0	0.00533333	0	0.00533333	43.3	4330
90%B		100	202.256	0	0	0	0	0	0	30.03	66.72	26	16	0	0	4	4	0	-1.3	43	4.28	4.88	4.284	1.512	217	0	0.128	-6.94	184.13	279.09	352.25	0	28.99	71.55	4.73	5.72	0	6.8564	15	3.4	18	0	15	0.001	0.006	0	0.005	39	3900
80%B		100	202.256	0	0	0	0	0	0	30.03	66.72	26	16	0	0	4	4	0	-1.3	43	4.28	4.88	4.284	1.512	217	0	0.128	-6.94	184.13	279.09	352.25	0	28.99	71.55	4.73	5.72	0	6.8564	13.3	6.7	20	0	13.3	0.00223333	0.00666667	0	0.00443333	34.4	3440
70%B		100	202.256	0	0	0	0	0	0	30.03	66.72	26	16	0	0	4	4	0	-1.3	43	4.28	4.88	4.284	1.512	217	0	0.128	-6.94	184.13	279.09	352.25	0	28.99	71.55	4.73	5.72	0	6.8564	11.7	10.4	21.7	0	11.7	0.00333333	0.00723333	0	0.0039	30.3	3030
60%B		100	202.256	0	0	0	0	0	0	30.03	66.72	26	16	0	0	4	4	0	-1.3	43	4.28	4.88	4.284	1.512	217	0	0.128	-6.94	184.13	279.09	352.25	0	28.99	71.55	4.73	5.72	0	6.8564	10	14.6	23.3	0	10	0.00443333	0.00776667	0	0.00333333	26	2600
50%B		100	202.256	0	0	0	0	0	0	30.03	66.72	26	16	0	0	4	4	0	-1.3	43	4.28	4.88	4.284	1.512	217	0	0.128	-6.94	184.13	279.09	352.25	0	28.99	71.55	4.73	5.72	0	6.8564	8.3	17.7	25	0	8.3	0.00556667	0.00833333	0	0.00276667	21.7	2170
40%B		100	202.256	0	0	0	0	0	0	30.03	66.72	26	16	0	0	4	4	0	-1.3	43	4.28	4.88	4.284	1.512	217	0	0.128	-6.94	184.13	279.09	352.25	0	28.99	71.55	4.73	5.72	0	6.8564	6.7	19	26.7	0	6.7	0.00666667	0.0089	0	0.00223333	17.3	1730
30%B		100	202.256	0	0	0	0	0	0	30.03	66.72	26	16	0	0	4	4	0	-1.3	43	4.28	4.88	4.284	1.512	217	0	0.128	-6.94	184.13	279.09	352.25	0	28.99	71.55	4.73	5.72	0	6.8564	5	20.4	28.3	0	5	0.00776667	0.00943333	0	0.00166667	13	1300
PPS		100	202.256	0	0	0	0	0	0	30.03	66.72	26	16	0	0	4	4	0	-1.3	43	4.28	4.88	4.284	1.512	217	0	0.128	-6.94	184.13	279.09	352.25	0	28.99	71.55	4.73	5.72	0	6.8564	0	0	0	0	0	0	0	0	0	0	0
PLA		100	202.256	0	0	0	0	0	0	30.03	66.72	26	16	0	0	4	4	0	-1.3	43	4.28	4.88	4.284	1.512	217	0	0.128	-6.94	184.13	279.09	352.25	0	28.99	71.55	4.73	5.72	0	6.8564	0	0	28	0	28	0	0.0028	0	0.014	0	0
PLGA		100	202.256	0	0	0	0	0	0	30.03	66.72	26	16	0	0	4	4	0	-1.3	43	4.28	4.88	4.284	1.512	217	0	0.128	-6.94	184.13	279.09	352.25	0	28.99	71.55	4.73	5.72	0	6.8564	0	0	154	0	154	0	0.077	0	0.0154	0	0
Pluronic		100	202.256	0	0	0	0	0	0	30.03	66.72	26	16	0	0	4	4	0	-1.3	43	4.28	4.88	4.284	1.512	217	0	0.128	-6.94	184.13	279.09	352.25	0	28.99	71.55	4.73	5.72	0	6.8564	0	0	65	0	65	0	0.0166667	0	0.0171053	0	0
100%B	Paclitaxel	27.4	853.918	4	14	10	0.0117107	0.45	221.29	86.54	218.29	113	62	11	14	7	3	1	-1.2	11.9	3.54	3.96	3.539	14.945	1790	0	0.00556	-5.2	762.16	1189.67	960.76	221.29	114.71	176.69	8.04	10.39	221.29	22.1289	16	0	16	0	16	0	0.00533333	0	0.00533333	43.3	1186.42
90%B		27.4	853.918	4	14	10	0.0117107	0.45	221.29	86.54	218.29	113	62	11	14	7	3	1	-1.2	11.9	3.54	3.96	3.539	14.945	1790	0	0.00556	-5.2	762.16	1189.67	960.76	221.29	114.71	176.69	8.04	10.39	221.29	22.1289	15	3.4	18	0	15	0.001	0.006	0	0.005	39	1068.6
80%B		27.4	853.918	4	14	10	0.0117107	0.45	221.29	86.54	218.29	113	62	11	14	7	3	1	-1.2	11.9	3.54	3.96	3.539	14.945	1790	0	0.00556	-5.2	762.16	1189.67	960.76	221.29	114.71	176.69	8.04	10.39	221.29	22.1289	13.3	6.7	20	0	13.3	0.00223333	0.00666667	0	0.00443333	34.4	942.56
70%B		27.4	853.918	4	14	10	0.0117107	0.45	221.29	86.54	218.29	113	62	11	14	7	3	1	-1.2	11.9	3.54	3.96	3.539	14.945	1790	0	0.00556	-5.2	762.16	1189.67	960.76	221.29	114.71	176.69	8.04	10.39	221.29	22.1289	11.7	10.4	21.7	0	11.7	0.00333333	0.00723333	0	0.0039	30.3	830.22
60%B		27.4	853.918	4	14	10	0.0117107	0.45	221.29	86.54	218.29	113	62	11	14	7	3	1	-1.2	11.9	3.54	3.96	3.539	14.945	1790	0	0.00556	-5.2	762.16	1189.67	960.76	221.29	114.71	176.69	8.04	10.39	221.29	22.1289	10	14.6	23.3	0	10	0.00443333	0.00776667	0	0.00333333	26	712.4
50%B		27.4	853.918	4	14	10	0.0117107	0.45	221.29	86.54	218.29	113	62	11	14	7	3	1	-1.2	11.9	3.54	3.96	3.539	14.945	1790	0	0.00556	-5.2	762.16	1189.67	960.76	221.29	114.71	176.69	8.04	10.39	221.29	22.1289	8.3	17.7	25	0	8.3	0.00556667	0.00833333	0	0.00276667	21.7	594.58
40%B		27.4	853.918	4	14	10	0.0117107	0.45	221.29	86.54	218.29	113	62	11	14	7	3	1	-1.2	11.9	3.54	3.96	3.539	14.945	1790	0	0.00556	-5.2	762.16	1189.67	960.76	221.29	114.71	176.69	8.04	10.39	221.29	22.1289	6.7	19	26.7	0	6.7	0.00666667	0.0089	0	0.00223333	17.3	474.02
30%B		27.4	853.918	4	14	10	0.0117107	0.45	221.29	86.54	218.29	113	62	11	14	7	3	1	-1.2	11.9	3.54	3.96	3.539	14.945	1790	0	0.00556	-5.2	762.16	1189.67	960.76	221.29	114.71	176.69	8.04	10.39	221.29	22.1289	5	20.4	28.3	0	5	0.00776667	0.00943333	0	0.00166667	13	356.2
PPS		27.4	853.918	4	14	10	0.0117107	0.45	221.29	86.54	218.29	113	62	11	14	7	3	1	-1.2	11.9	3.54	3.96	3.539	14.945	1790	0	0.00556	-5.2	762.16	1189.67	960.76	221.29	114.71	176.69	8.04	10.39	221.29	22.1289	0	0	0	0	0	0	0	0	0	0	0
PLA		27.4	853.918	4	14	10	0.0117107	0.45	221.29	86.54	218.29	113	62	11	14	7	3	1	-1.2	11.9	3.54	3.96	3.539	14.945	1790	0	0.00556	-5.2	762.16	1189.67	960.76	221.29	114.71	176.69	8.04	10.39	221.29	22.1289	0	0	28	0	28	0	0.0028	0	0.014	0	0
PLGA		27.4	853.918	4	14	10	0.0117107	0.45	221.29	86.54	218.29	113	62	11	14	7	3	1	-1.2	11.9	3.54	3.96	3.539	14.945	1790	0	0.00556	-5.2	762.16	1189.67	960.76	221.29	114.71	176.69	8.04	10.39	221.29	22.1289	0	0	154	0	154	0	0.077	0	0.0154	0	0
Pluronic		27.4	853.918	4	14	10	0.0117107	0.45	221.29	86.54	218.29	113	62	11	14	7	3	1	-1.2	11.9	3.54	3.96	3.539	14.945	1790	0	0.00556	-5.2	762.16	1189.67	960.76	221.29	114.71	176.69	8.04	10.39	221.29	22.1289	0	0	65	0	65	0	0.0166667	0	0.0171053	0	0
100%B	Bortezomib	41.2	384.24	4	6	2	0.00520512	0.37	124.44	40.16	99.37	53	28	2	9	2	2	1	2.4	8.64	1.51	0.89	1.53	18.999	500	0	0.0532	-3.9	362.49	580.13	621.26	124.44	62.82	104.36	5.88	7.84	123.38	10.4997	16	0	16	0	16	0	0.00533333	0	0.00533333	43.3	1783.96
90%B		41.2	384.24	4	6	2	0.00520512	0.37	124.44	40.16	99.37	53	28	2	9	2	2	1	2.4	8.64	1.51	0.89	1.53	18.999	500	0	0.0532	-3.9	362.49	580.13	621.26	124.44	62.82	104.36	5.88	7.84	123.38	10.4997	15	3.4	18	0	15	0.001	0.006	0	0.005	39	1606.8
80%B		41.2	384.24	4	6	2	0.00520512	0.37	124.44	40.16	99.37	53	28	2	9	2	2	1	2.4	8.64	1.51	0.89	1.53	18.999	500	0	0.0532	-3.9	362.49	580.13	621.26	124.44	62.82	104.36	5.88	7.84	123.38	10.4997	13.3	6.7	20	0	13.3	0.00223333	0.00666667	0	0.00443333	34.4	1417.28
70%B		41.2	384.24	4	6	2	0.00520512	0.37	124.44	40.16	99.37	53	28	2	9	2	2	1	2.4	8.64	1.51	0.89	1.53	18.999	500	0	0.0532	-3.9	362.49	580.13	621.26	124.44	62.82	104.36	5.88	7.84	123.38	10.4997	11.7	10.4	21.7	0	11.7	0.00333333	0.00723333	0	0.0039	30.3	1248.36
60%B		41.2	384.24	4	6	2	0.00520512	0.37	124.44	40.16	99.37	53	28	2	9	2	2	1	2.4	8.64	1.51	0.89	1.53	18.999	500	0	0.0532	-3.9	362.49	580.13	621.26	124.44	62.82	104.36	5.88	7.84	123.38	10.4997	10	14.6	23.3	0	10	0.00443333	0.00776667	0	0.00333333	26	1071.2
50%B		41.2	384.24	4	6	2	0.00520512	0.37	124.44	40.16	99.37	53	28	2	9	2	2	1	2.4	8.64	1.51	0.89	1.53	18.999	500	0	0.0532	-3.9	362.49	580.13	621.26	124.44	62.82	104.36	5.88	7.84	123.38	10.4997	8.3	17.7	25	0	8.3	0.00556667	0.00833333	0	0.00276667	21.7	894.04
40%B		41.2	384.24	4	6	2	0.00520512	0.37	124.44	40.16	99.37	53	28	2	9	2	2	1	2.4	8.64	1.51	0.89	1.53	18.999	500	0	0.0532	-3.9	362.49	580.13	621.26	124.44	62.82	104.36	5.88	7.84	123.38	10.4997	6.7	19	26.7	0	6.7	0.00666667	0.0089	0	0.00223333	17.3	712.76
30%B		41.2	384.24	4	6	2	0.00520512	0.37	124.44	40.16	99.37	53	28	2	9	2	2	1	2.4	8.64	1.51	0.89	1.53	18.999	500	0	0.0532	-3.9	362.49	580.13	621.26	124.44	62.82	104.36	5.88	7.84	123.38	10.4997	5	20.4	28.3	0	5	0.00776667	0.00943333	0	0.00166667	13	535.6
PPS		41.2	384.24	4	6	2	0.00520512	0.37	124.44	40.16	99.37	53	28	2	9	2	2	1	2.4	8.64	1.51	0.89	1.53	18.999	500	0	0.0532	-3.9	362.49	580.13	621.26	124.44	62.82	104.36	5.88	7.84	123.38	10.4997	0	0	0	0	0	0	0	0	0	0	0
PLA		41.2	384.24	4	6	2	0.00520512	0.37	124.44	40.16	99.37	53	28	2	9	2	2	1	2.4	8.64	1.51	0.89	1.53	18.999	500	0	0.0532	-3.9	362.49	580.13	621.26	124.44	62.82	104.36	5.88	7.84	123.38	10.4997	0	0	28	0	28	0	0.0028	0	0.014	0	0
PLGA		41.2	384.24	4	6	2	0.00520512	0.37	124.44	40.16	99.37	53	28	2	9	2	2	1	2.4	8.64	1.51	0.89	1.53	18.999	500	0	0.0532	-3.9	362.49	580.13	621.26	124.44	62.82	104.36	5.88	7.84	123.38	10.4997	0	0	154	0	154	0	0.077	0	0.0154	0	0
Pluronic		41.2	384.24	4	6	2	0.00520512	0.37	124.44	40.16	99.37	53	28	2	9	2	2	1	2.4	8.64	1.51	0.89	1.53	18.999	500	0	0.0532	-3.9	362.49	580.13	621.26	124.44	62.82	104.36	5.88	7.84	123.38	10.4997	0	0	65	0	65	0	0.0166667	0	0.0171053	0	0
100%B	Neratinib	51.4	557.05	2	8	6	0.010771	0.2	112.4	60.48	157.29	69	40	0	11	4	4	2	8.81	12.55	3.05	4.72	4.469	17.031	881	1	0.00674	-4.9	491.11	774.43	861.46	112.4	95.9	132.9	7.17	8.71	111.34	15.6187	16	0	16	0	16	0	0.00533333	0	0.00533333	43.3	2225.62
90%B		51.4	557.05	2	8	6	0.010771	0.2	112.4	60.48	157.29	69	40	0	11	4	4	2	8.81	12.55	3.05	4.72	4.469	17.031	881	1	0.00674	-4.9	491.11	774.43	861.46	112.4	95.9	132.9	7.17	8.71	111.34	15.6187	15	3.4	18	0	15	0.001	0.006	0	0.005	39	2004.6
80%B		51.4	557.05	2	8	6	0.010771	0.2	112.4	60.48	157.29	69	40	0	11	4	4	2	8.81	12.55	3.05	4.72	4.469	17.031	881	1	0.00674	-4.9	491.11	774.43	861.46	112.4	95.9	132.9	7.17	8.71	111.34	15.6187	13.3	6.7	20	0	13.3	0.00223333	0.00666667	0	0.00443333	34.4	1768.16
70%B		51.4	557.05	2	8	6	0.010771	0.2	112.4	60.48	157.29	69	40	0	11	4	4	2	8.81	12.55	3.05	4.72	4.469	17.031	881	1	0.00674	-4.9	491.11	774.43	861.46	112.4	95.9	132.9	7.17	8.71	111.34	15.6187	11.7	10.4	21.7	0	11.7	0.00333333	0.00723333	0	0.0039	30.3	1557.42
60%B		51.4	557.05	2	8	6	0.010771	0.2	112.4	60.48	157.29	69	40	0	11	4	4	2	8.81	12.55	3.05	4.72	4.469	17.031	881	1	0.00674	-4.9	491.11	774.43	861.46	112.4	95.9	132.9	7.17	8.71	111.34	15.6187	10	14.6	23.3	0	10	0.00443333	0.00776667	0	0.00333333	26	1336.4
50%B		51.4	557.05	2	8	6	0.010771	0.2	112.4	60.48	157.29	69	40	0	11	4	4	2	8.81	12.55	3.05	4.72	4.469	17.031	881	1	0.00674	-4.9	491.11	774.43	861.46	112.4	95.9	132.9	7.17	8.71	111.34	15.6187	8.3	17.7	25	0	8.3	0.00556667	0.00833333	0	0.00276667	21.7	1115.38
40%B		51.4	557.05	2	8	6	0.010771	0.2	112.4	60.48	157.29	69	40	0	11	4	4	2	8.81	12.55	3.05	4.72	4.469	17.031	881	1	0.00674	-4.9	491.11	774.43	861.46	112.4	95.9	132.9	7.17	8.71	111.34	15.6187	6.7	19	26.7	0	6.7	0.00666667	0.0089	0	0.00223333	17.3	889.22
30%B		51.4	557.05	2	8	6	0.010771	0.2	112.4	60.48	157.29	69	40	0	11	4	4	2	8.81	12.55	3.05	4.72	4.469	17.031	881	1	0.00674	-4.9	491.11	774.43	861.46	112.4	95.9	132.9	7.17	8.71	111.34	15.6187	5	20.4	28.3	0	5	0.00776667	0.00943333	0	0.00166667	13	668.2
PPS		51.4	557.05	2	8	6	0.010771	0.2	112.4	60.48	157.29	69	40	0	11	4	4	2	8.81	12.55	3.05	4.72	4.469	17.031	881	1	0.00674	-4.9	491.11	774.43	861.46	112.4	95.9	132.9	7.17	8.71	111.34	15.6187	0	0	0	0	0	0	0	0	0	0	0
PLA		51.4	557.05	2	8	6	0.010771	0.2	112.4	60.48	157.29	69	40	0	11	4	4	2	8.81	12.55	3.05	4.72	4.469	17.031	881	1	0.00674	-4.9	491.11	774.43	861.46	112.4	95.9	132.9	7.17	8.71	111.34	15.6187	0	0	28	0	28	0	0.0028	0	0.014	0	0
PLGA		51.4	557.05	2	8	6	0.010771	0.2	112.4	60.48	157.29	69	40	0	11	4	4	2	8.81	12.55	3.05	4.72	4.469	17.031	881	1	0.00674	-4.9	491.11	774.43	861.46	112.4	95.9	132.9	7.17	8.71	111.34	15.6187	0	0	154	0	154	0	0.077	0	0.0154	0	0
Pluronic		51.4	557.05	2	8	6	0.010771	0.2	112.4	60.48	157.29	69	40	0	11	4	4	2	8.81	12.55	3.05	4.72	4.469	17.031	881	1	0.00674	-4.9	491.11	774.43	861.46	112.4	95.9	132.9	7.17	8.71	111.34	15.6187	0	0	65	0	65	0	0.0166667	0	0.0171053	0	0
100%B	Osmirtinib	55.1	499.619	2	7	5	0.0100076	0.25	87.55	58.1	150.32	70	37	0	10	4	4	2	8.87	13.64	3.01	5.45	4.487	16.964	752	1	0.0224	-4.4	464.59	758.46	818.91	87.55	69.07	143.61	6.75	9.23	84.8	14.7585	16	0	16	0	16	0	0.00533333	0	0.00533333	43.3	2385.83
90%B		55.1	499.619	2	7	5	0.0100076	0.25	87.55	58.1	150.32	70	37	0	10	4	4	2	8.87	13.64	3.01	5.45	4.487	16.964	752	1	0.0224	-4.4	464.59	758.46	818.91	87.55	69.07	143.61	6.75	9.23	84.8	14.7585	15	3.4	18	0	15	0.001	0.006	0	0.005	39	2148.9
80%B		55.1	499.619	2	7	5	0.0100076	0.25	87.55	58.1	150.32	70	37	0	10	4	4	2	8.87	13.64	3.01	5.45	4.487	16.964	752	1	0.0224	-4.4	464.59	758.46	818.91	87.55	69.07	143.61	6.75	9.23	84.8	14.7585	13.3	6.7	20	0	13.3	0.00223333	0.00666667	0	0.00443333	34.4	1895.44
70%B		55.1	499.619	2	7	5	0.0100076	0.25	87.55	58.1	150.32	70	37	0	10	4	4	2	8.87	13.64	3.01	5.45	4.487	16.964	752	1	0.0224	-4.4	464.59	758.46	818.91	87.55	69.07	143.61	6.75	9.23	84.8	14.7585	11.7	10.4	21.7	0	11.7	0.00333333	0.00723333	0	0.0039	30.3	1669.53
60%B		55.1	499.619	2	7	5	0.0100076	0.25	87.55	58.1	150.32	70	37	0	10	4	4	2	8.87	13.64	3.01	5.45	4.487	16.964	752	1	0.0224	-4.4	464.59	758.46	818.91	87.55	69.07	143.61	6.75	9.23	84.8	14.7585	10	14.6	23.3	0	10	0.00443333	0.00776667	0	0.00333333	26	1432.6
50%B		55.1	499.619	2	7	5	0.0100076	0.25	87.55	58.1	150.32	70	37	0	10	4	4	2	8.87	13.64	3.01	5.45	4.487	16.964	752	1	0.0224	-4.4	464.59	758.46	818.91	87.55	69.07	143.61	6.75	9.23	84.8	14.7585	8.3	17.7	25	0	8.3	0.00556667	0.00833333	0	0.00276667	21.7	1195.67
40%B		55.1	499.619	2	7	5	0.0100076	0.25	87.55	58.1	150.32	70	37	0	10	4	4	2	8.87	13.64	3.01	5.45	4.487	16.964	752	1	0.0224	-4.4	464.59	758.46	818.91	87.55	69.07	143.61	6.75	9.23	84.8	14.7585	6.7	19	26.7	0	6.7	0.00666667	0.0089	0	0.00223333	17.3	953.23
30%B		55.1	499.619	2	7	5	0.0100076	0.25	87.55	58.1	150.32	70	37	0	10	4	4	2	8.87	13.64	3.01	5.45	4.487	16.964	752	1	0.0224	-4.4	464.59	758.46	818.91	87.55	69.07	143.61	6.75	9.23	84.8	14.7585	5	20.4	28.3	0	5	0.00776667	0.00943333	0	0.00166667	13	716.3
PPS		55.1	499.619	2	7	5	0.0100076	0.25	87.55	58.1	150.32	70	37	0	10	4	4	2	8.87	13.64	3.01	5.45	4.487	16.964	752	1	0.0224	-4.4	464.59	758.46	818.91	87.55	69.07	143.61	6.75	9.23	84.8	14.7585	0	0	0	0	0	0	0	0	0	0	0
PLA		55.1	499.619	2	7	5	0.0100076	0.25	87.55	58.1	150.32	70	37	0	10	4	4	2	8.87	13.64	3.01	5.45	4.487	16.964	752	1	0.0224	-4.4	464.59	758.46	818.91	87.55	69.07	143.61	6.75	9.23	84.8	14.7585	0	0	28	0	28	0	0.0028	0	0.014	0	0
PLGA		55.1	499.619	2	7	5	0.0100076	0.25	87.55	58.1	150.32	70	37	0	10	4	4	2	8.87	13.64	3.01	5.45	4.487	16.964	752	1	0.0224	-4.4	464.59	758.46	818.91	87.55	69.07	143.61	6.75	9.23	84.8	14.7585	0	0	154	0	154	0	0.077	0	0.0154	0	0
Pluronic		55.1	499.619	2	7	5	0.0100076	0.25	87.55	58.1	150.32	70	37	0	10	4	4	2	8.87	13.64	3.01	5.45	4.487	16.964	752	1	0.0224	-4.4	464.59	758.46	818.91	87.55	69.07	143.61	6.75	9.23	84.8	14.7585	0	0	65	0	65	0	0.0166667	0	0.0171053	0	0
100%B	Etoposide	26.5	588.562	3	12	9	0.0170015	0.55	160.83	55.93	139.02	74	42	10	5	7	2	4	-3.7	9.33	1.16	0.6	1.16	14.791	969	0	0.08	-2.8	496.16	781.41	800.56	160.83	75.25	143.05	6.19	10.23	160.83	14.0703	16	0	16	0	16	0	0.00533333	0	0.00533333	43.3	1147.45
90%B		26.5	588.562	3	12	9	0.0170015	0.55	160.83	55.93	139.02	74	42	10	5	7	2	4	-3.7	9.33	1.16	0.6	1.16	14.791	969	0	0.08	-2.8	496.16	781.41	800.56	160.83	75.25	143.05	6.19	10.23	160.83	14.0703	15	3.4	18	0	15	0.001	0.006	0	0.005	39	1033.5
80%B		26.5	588.562	3	12	9	0.0170015	0.55	160.83	55.93	139.02	74	42	10	5	7	2	4	-3.7	9.33	1.16	0.6	1.16	14.791	969	0	0.08	-2.8	496.16	781.41	800.56	160.83	75.25	143.05	6.19	10.23	160.83	14.0703	13.3	6.7	20	0	13.3	0.00223333	0.00666667	0	0.00443333	34.4	911.6
70%B		26.5	588.562	3	12	9	0.0170015	0.55	160.83	55.93	139.02	74	42	10	5	7	2	4	-3.7	9.33	1.16	0.6	1.16	14.791	969	0	0.08	-2.8	496.16	781.41	800.56	160.83	75.25	143.05	6.19	10.23	160.83	14.0703	11.7	10.4	21.7	0	11.7	0.00333333	0.00723333	0	0.0039	30.3	802.95
60%B		26.5	588.562	3	12	9	0.0170015	0.55	160.83	55.93	139.02	74	42	10	5	7	2	4	-3.7	9.33	1.16	0.6	1.16	14.791	969	0	0.08	-2.8	496.16	781.41	800.56	160.83	75.25	143.05	6.19	10.23	160.83	14.0703	10	14.6	23.3	0	10	0.00443333	0.00776667	0	0.00333333	26	689
50%B		26.5	588.562	3	12	9	0.0170015	0.55	160.83	55.93	139.02	74	42	10	5	7	2	4	-3.7	9.33	1.16	0.6	1.16	14.791	969	0	0.08	-2.8	496.16	781.41	800.56	160.83	75.25	143.05	6.19	10.23	160.83	14.0703	8.3	17.7	25	0	8.3	0.00556667	0.00833333	0	0.00276667	21.7	575.05
40%B		26.5	588.562	3	12	9	0.0170015	0.55	160.83	55.93	139.02	74	42	10	5	7	2	4	-3.7	9.33	1.16	0.6	1.16	14.791	969	0	0.08	-2.8	496.16	781.41	800.56	160.83	75.25	143.05	6.19	10.23	160.83	14.0703	6.7	19	26.7	0	6.7	0.00666667	0.0089	0	0.00223333	17.3	458.45
30%B		26.5	588.562	3	12	9	0.0170015	0.55	160.83	55.93	139.02	74	42	10	5	7	2	4	-3.7	9.33	1.16	0.6	1.16	14.791	969	0	0.08	-2.8	496.16	781.41	800.56	160.83	75.25	143.05	6.19	10.23	160.83	14.0703	5	20.4	28.3	0	5	0.00776667	0.00943333	0	0.00166667	13	344.5
PPS		26.5	588.562	3	12	9	0.0170015	0.55	160.83	55.93	139.02	74	42	10	5	7	2	4	-3.7	9.33	1.16	0.6	1.16	14.791	969	0	0.08	-2.8	496.16	781.41	800.56	160.83	75.25	143.05	6.19	10.23	160.83	14.0703	0	0	0	0	0	0	0	0	0	0	0
PLA		26.5	588.562	3	12	9	0.0170015	0.55	160.83	55.93	139.02	74	42	10	5	7	2	4	-3.7	9.33	1.16	0.6	1.16	14.791	969	0	0.08	-2.8	496.16	781.41	800.56	160.83	75.25	143.05	6.19	10.23	160.83	14.0703	0	0	28	0	28	0	0.0028	0	0.014	0	0
PLGA		26.5	588.562	3	12	9	0.0170015	0.55	160.83	55.93	139.02	74	42	10	5	7	2	4	-3.7	9.33	1.16	0.6	1.16	14.791	969	0	0.08	-2.8	496.16	781.41	800.56	160.83	75.25	143.05	6.19	10.23	160.83	14.0703	0	0	154	0	154	0	0.077	0	0.0154	0	0
Pluronic		26.5	588.562	3	12	9	0.0170015	0.55	160.83	55.93	139.02	74	42	10	5	7	2	4	-3.7	9.33	1.16	0.6	1.16	14.791	969	0	0.08	-2.8	496.16	781.41	800.56	160.83	75.25	143.05	6.19	10.23	160.83	14.0703	0	0	65	0	65	0	0.0166667	0	0.0171053	0	0
100%B	Chloroquine	40.4	319.88	1	3	2	0.00626604	0.5	28.16	38.08	96.42	48	22	1	8	2	2	1	10.92	8.4	0.29	4.63	3.934	9.445	309	2	0.0175	-4.3	312.58	528.43	597.8	28.16	67.32	85.87	5.67	6.47	27.63	9.5685	16	0	16	0	16	0	0.00533333	0	0.00533333	43.3	1749.32
90%B		40.4	319.88	1	3	2	0.00626604	0.5	28.16	38.08	96.42	48	22	1	8	2	2	1	10.92	8.4	0.29	4.63	3.934	9.445	309	2	0.0175	-4.3	312.58	528.43	597.8	28.16	67.32	85.87	5.67	6.47	27.63	9.5685	15	3.4	18	0	15	0.001	0.006	0	0.005	39	1575.6
80%B		40.4	319.88	1	3	2	0.00626604	0.5	28.16	38.08	96.42	48	22	1	8	2	2	1	10.92	8.4	0.29	4.63	3.934	9.445	309	2	0.0175	-4.3	312.58	528.43	597.8	28.16	67.32	85.87	5.67	6.47	27.63	9.5685	13.3	6.7	20	0	13.3	0.00223333	0.00666667	0	0.00443333	34.4	1389.76
70%B		40.4	319.88	1	3	2	0.00626604	0.5	28.16	38.08	96.42	48	22	1	8	2	2	1	10.92	8.4	0.29	4.63	3.934	9.445	309	2	0.0175	-4.3	312.58	528.43	597.8	28.16	67.32	85.87	5.67	6.47	27.63	9.5685	11.7	10.4	21.7	0	11.7	0.00333333	0.00723333	0	0.0039	30.3	1224.12
60%B		40.4	319.88	1	3	2	0.00626604	0.5	28.16	38.08	96.42	48	22	1	8	2	2	1	10.92	8.4	0.29	4.63	3.934	9.445	309	2	0.0175	-4.3	312.58	528.43	597.8	28.16	67.32	85.87	5.67	6.47	27.63	9.5685	10	14.6	23.3	0	10	0.00443333	0.00776667	0	0.00333333	26	1050.4
50%B		40.4	319.88	1	3	2	0.00626604	0.5	28.16	38.08	96.42	48	22	1	8	2	2	1	10.92	8.4	0.29	4.63	3.934	9.445	309	2	0.0175	-4.3	312.58	528.43	597.8	28.16	67.32	85.87	5.67	6.47	27.63	9.5685	8.3	17.7	25	0	8.3	0.00556667	0.00833333	0	0.00276667	21.7	876.68
40%B		40.4	319.88	1	3	2	0.00626604	0.5	28.16	38.08	96.42	48	22	1	8	2	2	1	10.92	8.4	0.29	4.63	3.934	9.445	309	2	0.0175	-4.3	312.58	528.43	597.8	28.16	67.32	85.87	5.67	6.47	27.63	9.5685	6.7	19	26.7	0	6.7	0.00666667	0.0089	0	0.00223333	17.3	698.92
30%B		40.4	319.88	1	3	2	0.00626604	0.5	28.16	38.08	96.42	48	22	1	8	2	2	1	10.92	8.4	0.29	4.63	3.934	9.445	309	2	0.0175	-4.3	312.58	528.43	597.8	28.16	67.32	85.87	5.67	6.47	27.63	9.5685	5	20.4	28.3	0	5	0.00776667	0.00943333	0	0.00166667	13	525.2
PPS		40.4	319.88	1	3	2	0.00626604	0.5	28.16	38.08	96.42	48	22	1	8	2	2	1	10.92	8.4	0.29	4.63	3.934	9.445	309	2	0.0175	-4.3	312.58	528.43	597.8	28.16	67.32	85.87	5.67	6.47	27.63	9.5685	0	0	0	0	0	0	0	0	0	0	0
PLA		40.4	319.88	1	3	2	0.00626604	0.5	28.16	38.08	96.42	48	22	1	8	2	2	1	10.92	8.4	0.29	4.63	3.934	9.445	309	2	0.0175	-4.3	312.58	528.43	597.8	28.16	67.32	85.87	5.67	6.47	27.63	9.5685	0	0	28	0	28	0	0.0028	0	0.014	0	0
PLGA		40.4	319.88	1	3	2	0.00626604	0.5	28.16	38.08	96.42	48	22	1	8	2	2	1	10.92	8.4	0.29	4.63	3.934	9.445	309	2	0.0175	-4.3	312.58	528.43	597.8	28.16	67.32	85.87	5.67	6.47	27.63	9.5685	0	0	154	0	154	0	0.077	0	0.0154	0	0
Pluronic		40.4	319.88	1	3	2	0.00626604	0.5	28.16	38.08	96.42	48	22	1	8	2	2	1	10.92	8.4	0.29	4.63	3.934	9.445	309	2	0.0175	-4.3	312.58	528.43	597.8	28.16	67.32	85.87	5.67	6.47	27.63	9.5685	0	0	65	0	65	0	0.0166667	0	0.0171053	0	0
50% Amide	Etoposide	26.5	588.562	3	12	9	0.0170015	0.55	160.83	55.93	139.02	74	42	10	5	7	2	4	-3.7	9.33	1.16	0.6	1.16	14.791	969	0	0.08	-2.8	496.16	781.41	800.56	160.83	75.25	143.05	6.19	10.23	160.83	14.0703	8.3	0	17.1	8.77	8.3	0	0.0057	0.00292333	0.00276667	21.7	575.05
50% Amide	Doxycycline	17.6	444.44	6	9	3	0.00675007	0.41	181.62	43.14	113.89	56	32	6	2	4	1	0	8.64	3.31	-3.8	0.63	-3.371	23.066	956	0	0.63	-2.8	379.42	559.11	520.77	181.62	66.38	91.09	5.27	7.24	181.62	11.2884	8.3	0	17.1	8.77	8.3	0	0.0057	0.00292333	0.00276667	21.7	381.92
50% Amide	Resveratrol	68.4	228.247	3	3	0	0	0	60.69	25.17	67.46	29	17	0	2	2	2	0	-6.2	8.49	3.37	3.1	3.402	8.656	246	0	0.0688	-3.5	204.56	308.38	419.53	60.69	27.59	78.28	3.99	7.25	60.69	6.7133	8.3	0	17.1	8.77	8.3	0	0.0057	0.00292333	0.00276667	21.7	1484.28
50% Amide	Chrysin	61.4	254.241	2	4	2	0.00786655	0	66.76	26.4	70.93	29	19	0	1	3	3	1	-5.4	6.58	2.09	3.52	3.01	8.096	384	-1	0.105	-3.4	213.53	315.31	416.5	66.76	34.78	75.03	4.23	6.7	105.45	8.3673	8.3	0	17.1	8.77	8.3	0	0.0057	0.00292333	0.00276667	21.7	1332.38
50%B	Doxycycline	17.6	444.44	6	9	3	0.00675007	0.41	181.62	43.14	113.89	56	32	6	2	4	1	0	8.64	3.31	-3.8	0.63	-3.371	23.066	956	0	0.63	-2.8	379.42	559.11	520.77	181.62	66.38	91.09	5.27	7.24	181.62	11.2884	8.3	17.7	25	0	8.3	0.00556667	0.00833333	0	0.00276667	21.7	381.92
50%B	Resveratrol	68.4	228.247	3	3	0	0	0	60.69	25.17	67.46	29	17	0	2	2	2	0	-6.2	8.49	3.37	3.1	3.402	8.656	246	0	0.0688	-3.5	204.56	308.38	419.53	60.69	27.59	78.28	3.99	7.25	60.69	6.7133	8.3	17.7	25	0	8.3	0.00556667	0.00833333	0	0.00276667	21.7	1484.28
50%B	Chrysin	61.4	254.241	2	4	2	0.00786655	0	66.76	26.4	70.93	29	19	0	1	3	3	1	-5.4	6.58	2.09	3.52	3.01	8.096	384	-1	0.105	-3.4	213.53	315.31	416.5	66.76	34.78	75.03	4.23	6.7	105.45	8.3673	8.3	17.7	25	0	8.3	0.00556667	0.00833333	0	0.00276667	21.7	1332.38
PLA	Chloroquine	40.4	319.88	1	3	2	0.00625234	0.5	28.16	38.08	96.42	48	22	1	8	2	2	1	10.92	20	0.29	4.63	3.934	9.445	309	2	0.0175	-4.3	312.58	528.43	597.8	28.16	67.32	85.87	5.67	6.47	27.63	9.5685	0	0	28	0	28	0	0.0028	0	0.014	0	0
PLA	Hydroxychloroquine	38.5	335.88	2	4	2	0.00595451	0.5	48.39	38.67	97.97	49	23	1	9	2	2	1	9.76	15.59	0.13	3.87	2.887	11.148	331	2	0.0261	-4.1	321.35	538.67	603.39	48.39	68.56	85.77	5.81	6.43	47.86	9.7216	0	0	28	0	28	0	0.0028	0	0.014	0	0
PLA	Fluoxetine	50.4	309.332	1	2	1	0.00323277	0.29	21.26	30.44	80.37	40	22	1	7	2	2	0	9.4	20	2.19	4.09	4.173	9.45	308	1	0.0017	-5.3	274.24	450.56	556.68	21.26	44.26	81.45	4.61	7.49	21.26	8.0871	0	0	28	0	28	0	0.0028	0	0.014	0	0
PLA	Irinotecan	38.2	586.689	1	6	5	0.0085224	0.52	112.51	62.93	161.33	81	43	1	5	7	3	6	9.17	11.71	1	3.94	2.776	12.814	1200	1	0.107	-3.7	528.76	841.25	807.72	112.51	79.74	159.34	7.45	9.26	47.86	9.7216	0	0	28	0	28	0	0.0028	0	0.014	0	0
PLA	Doxycycline	17.6	444.44	6	9	3	0.00675007	0.41	181.62	43.14	113.89	56	32	6	2	4	1	0	8.64	3.31	-3.8	0.63	-3.371	23.066	956	0	0.63	-2.8	379.42	559.11	520.77	181.62	66.38	91.09	5.27	7.24	181.62	11.2884	0	0	28	0	28	0	0.0028	0	0.014	0	0
PLA	Ropivacaine	28.5	274.408	1	2	1	0.00364421	0.59	32.34	32.44	85.59	46	20	1	4	2	1	1	7.8	13.62	3.53	2.9	4.071	14.833	308	1	0.49	-2.75	284.71	486.6	503.78	32.34	56.56	84.07	5.63	6.7	32.34	8.3861	0	0	28	0	28	0	0.0028	0	0.014	0	0
PLGA	Chloroquine	40.4	319.88	1	3	2	0.00625234	0.5	28.16	38.08	96.42	48	22	1	8	2	2	1	10.92	20	0.29	4.63	3.934	9.445	309	2	0.0175	-4.3	312.58	528.43	597.8	28.16	67.32	85.87	5.67	6.47	27.63	9.5685	0	0	154	0	154	0	0.077	0	0.0154	0	0
PLGA	Hydroxychloroquine	38.5	335.88	2	4	2	0.00595451	0.5	48.39	38.67	97.97	49	23	1	9	2	2	1	9.76	15.59	0.13	3.87	2.887	11.148	331	2	0.0261	-4.1	321.35	538.67	603.39	48.39	68.56	85.77	5.81	6.43	47.86	9.7216	0	0	154	0	154	0	0.077	0	0.0154	0	0
PLGA	Fluoxetine	50.4	309.332	1	2	1	0.00323277	0.29	21.26	30.44	80.37	40	22	1	7	2	2	0	9.4	20	2.19	4.09	4.173	9.45	308	1	0.0017	-5.3	274.24	450.56	556.68	21.26	44.26	81.45	4.61	7.49	21.26	8.0871	0	0	154	0	154	0	0.077	0	0.0154	0	0
PLGA	Irinotecan	38.2	586.689	1	6	5	0.0085224	0.52	112.51	62.93	161.33	81	43	1	5	7	3	6	9.17	11.71	1	3.94	2.776	12.814	1200	1	0.107	-3.7	528.76	841.25	807.72	112.51	79.74	159.34	7.45	9.26	47.86	9.7216	0	0	154	0	154	0	0.077	0	0.0154	0	0
PLGA	Doxycycline	17.6	444.44	6	9	3	0.00675007	0.41	181.62	43.14	113.89	56	32	6	2	4	1	0	8.64	3.31	-3.8	0.63	-3.371	23.066	956	0	0.63	-2.8	379.42	559.11	520.77	181.62	66.38	91.09	5.27	7.24	181.62	11.2884	0	0	154	0	154	0	0.077	0	0.0154	0	0
PLGA	Ropivacaine	28.5	274.408	1	2	1	0.00364421	0.59	32.34	32.44	85.59	46	20	1	4	2	1	1	7.8	13.62	3.53	2.9	4.071	14.833	308	1	0.49	-2.75	284.71	486.6	503.78	32.34	56.56	84.07	5.63	6.7	32.34	8.3861	0	0	154	0	154	0	0.077	0	0.0154	0	0
20%COOH	Chloroquine	40.4	319.88	1	3	2	0.00625234	0.5	28.16	38.08	96.42	48	22	1	8	2	2	1	10.92	20	0.29	4.63	3.934	9.445	309	2	0.0175	-4.3	312.58	528.43	597.8	28.16	67.32	85.87	5.67	6.47	27.63	9.5685	13.3	0	23.3	10	13.3	0	0.00776667	0.00333333	0.00443333	32.8	1325.12
20%COOH	Hydroxychloroquine	38.5	335.88	2	4	2	0.00595451	0.5	48.39	38.67	97.97	49	23	1	9	2	2	1	9.76	15.59	0.13	3.87	2.887	11.148	331	2	0.0261	-4.1	321.35	538.67	603.39	48.39	68.56	85.77	5.81	6.43	47.86	9.7216	13.3	0	23.3	10	13.3	0	0.00776667	0.00333333	0.00443333	32.8	1262.8
20%COOH	Fluoxetine	50.4	309.332	1	2	1	0.00323277	0.29	21.26	30.44	80.37	40	22	1	7	2	2	0	9.4	20	2.19	4.09	4.173	9.45	308	1	0.0017	-5.3	274.24	450.56	556.68	21.26	44.26	81.45	4.61	7.49	21.26	8.0871	13.3	0	23.3	10	13.3	0	0.00776667	0.00333333	0.00443333	32.8	1653.12
20%COOH	Irinotecan	38.2	586.689	1	6	5	0.0085224	0.52	112.51	62.93	161.33	81	43	1	5	7	3	6	9.17	11.71	1	3.94	2.776	12.814	1200	1	0.107	-3.7	528.76	841.25	807.72	112.51	79.74	159.34	7.45	9.26	47.86	9.7216	13.3	0	23.3	10	13.3	0	0.00776667	0.00333333	0.00443333	32.8	1252.96
10%COOH	Chloroquine	40.4	319.88	1	3	2	0.00625234	0.5	28.16	38.08	96.42	48	22	1	8	2	2	1	10.92	20	0.29	4.63	3.934	9.445	309	2	0.0175	-4.3	312.58	528.43	597.8	28.16	67.32	85.87	5.67	6.47	27.63	9.5685	15	0	20	5	15	0	0.00666667	0.00166667	0.005	37	1494.8
10%COOH	Hydroxychloroquine	38.5	335.88	2	4	2	0.00595451	0.5	48.39	38.67	97.97	49	23	1	9	2	2	1	9.76	15.59	0.13	3.87	2.887	11.148	331	2	0.0261	-4.1	321.35	538.67	603.39	48.39	68.56	85.77	5.81	6.43	47.86	9.7216	15	0	20	5	15	0	0.00666667	0.00166667	0.005	37	1424.5
10%COOH	Fluoxetine	50.4	309.332	1	2	1	0.00323277	0.29	21.26	30.44	80.37	40	22	1	7	2	2	0	9.4	20	2.19	4.09	4.173	9.45	308	1	0.0017	-5.3	274.24	450.56	556.68	21.26	44.26	81.45	4.61	7.49	21.26	8.0871	15	0	20	5	15	0	0.00666667	0.00166667	0.005	37	1864.8
10%COOH	Irinotecan	38.2	586.689	1	6	5	0.0085224	0.52	112.51	62.93	161.33	81	43	1	5	7	3	6	9.17	11.71	1	3.94	2.776	12.814	1200	1	0.107	-3.7	528.76	841.25	807.72	112.51	79.74	159.34	7.45	9.26	47.86	9.7216	15	0	20	5	15	0	0.00666667	0.00166667	0.005	37	1413.4
5%COOH	Chloroquine	40.4	319.88	1	3	2	0.00625234	0.5	28.16	38.08	96.42	48	22	1	8	2	2	1	10.92	20	0.29	4.63	3.934	9.445	309	2	0.0175	-4.3	312.58	528.43	597.8	28.16	67.32	85.87	5.67	6.47	27.63	9.5685	15.83	0	18.33	2.5	15.83	0	0.00611	0.000833333	0.00527667	39	1575.6
5%COOH	Hydroxychloroquine	38.5	335.88	2	4	2	0.00595451	0.5	48.39	38.67	97.97	49	23	1	9	2	2	1	9.76	15.59	0.13	3.87	2.887	11.148	331	2	0.0261	-4.1	321.35	538.67	603.39	48.39	68.56	85.77	5.81	6.43	47.86	9.7216	15.83	0	18.33	2.5	15.83	0	0.00611	0.000833333	0.00527667	39	1501.5
5%COOH	Fluoxetine	50.4	309.332	1	2	1	0.00323277	0.29	21.26	30.44	80.37	40	22	1	7	2	2	0	9.4	20	2.19	4.09	4.173	9.45	308	1	0.0017	-5.3	274.24	450.56	556.68	21.26	44.26	81.45	4.61	7.49	21.26	8.0871	15.83	0	18.33	2.5	15.83	0	0.00611	0.000833333	0.00527667	39	1965.6
5%COOH	Irinotecan	38.2	586.689	1	6	5	0.0085224	0.52	112.51	62.93	161.33	81	43	1	5	7	3	6	9.17	11.71	1	3.94	2.776	12.814	1200	1	0.107	-3.7	528.76	841.25	807.72	112.51	79.74	159.34	7.45	9.26	47.86	9.7216	15.83	0	18.33	2.5	15.83	0	0.00611	0.000833333	0.00527667	39	1489.8
100%B	Hydroxychloroquine	38.5	335.88	2	4	2	0.00595451	0.5	48.39	38.67	97.97	49	23	1	9	2	2	1	9.76	15.59	0.13	3.87	2.887	11.148	331	2	0.0261	-4.1	321.35	538.67	603.39	48.39	68.56	85.77	5.81	6.43	47.86	9.7216	16	0	16	0	16	0	0.00533333	0	0.00533333	43.3	1667.05
100%B	Fluoxetine	50.4	309.332	1	2	1	0.00323277	0.29	21.26	30.44	80.37	40	22	1	7	2	2	0	9.4	20	2.19	4.09	4.173	9.45	308	1	0.0017	-5.3	274.24	450.56	556.68	21.26	44.26	81.45	4.61	7.49	21.26	8.0871	16	0	16	0	16	0	0.00533333	0	0.00533333	43.3	2182.32
100%B	Irinotecan	38.2	586.689	1	6	5	0.0085224	0.52	112.51	62.93	161.33	81	43	1	5	7	3	6	9.17	11.71	1	3.94	2.776	12.814	1200	1	0.107	-3.7	528.76	841.25	807.72	112.51	79.74	159.34	7.45	9.26	47.86	9.7216	16	0	16	0	16	0	0.00533333	0	0.00533333	43.3	1654.06
20%COOH	Neratinib	51.4	557.05	2	8	6	0.010771	0.2	112.4	60.48	157.29	69	40	0	11	4	4	2	8.81	12.55	3.05	4.72	4.469	17.031	881	1	0.00674	-4.9	491.11	774.43	861.46	112.4	95.9	132.9	7.17	8.71	111.34	15.6187	13.3	0	23.3	10	13.3	0	0.00776667	0.00333333	0.00443333	32.8	1685.92
10%COOH	Neratinib	51.4	557.05	2	8	6	0.010771	0.2	112.4	60.48	157.29	69	40	0	11	4	4	2	8.81	12.55	3.05	4.72	4.469	17.031	881	1	0.00674	-4.9	491.11	774.43	861.46	112.4	95.9	132.9	7.17	8.71	111.34	15.6187	15	0	20	5	15	0	0.00666667	0.00166667	0.005	37	1901.8
5%COOH	Neratinib	51.4	557.05	2	8	6	0.010771	0.2	112.4	60.48	157.29	69	40	0	11	4	4	2	8.81	12.55	3.05	4.72	4.469	17.031	881	1	0.00674	-4.9	491.11	774.43	861.46	112.4	95.9	132.9	7.17	8.71	111.34	15.6187	15.83	0	18.33	2.5	15.83	0	0.00611	0.000833333	0.00527667	39	2004.6
PPO	Pyrene	100	202.256	0	0	0	0	0	0	30.03	66.72	26	16	0	0	4	4	0	-1.3	43	4.28	4.88	4.284	1.512	217	0	0.128	-6.94	184.13	279.09	352.25	0	28.99	71.55	4.73	5.72	0	6.8564	0	0	52	0	52	0	0.0173333	0	0.0173333	0	0
PPO	Neratinib	51.4	557.05	2	8	6	0.010771	0.2	112.4	60.48	157.29	69	40	0	11	4	4	2	8.81	12.55	3.05	4.72	4.469	17.031	881	1	0.00674	-4.9	491.11	774.43	861.46	112.4	95.9	132.9	7.17	8.71	111.34	15.6187	0	0	52	0	52	0	0.0173333	0	0.0173333	0	0
PPO	Etoposide	26.5	588.562	3	12	9	0.0170015	0.55	160.83	55.93	139.02	74	42	10	5	7	2	4	-3.7	9.33	1.16	0.6	1.16	14.791	969	0	0.08	-2.8	496.16	781.41	800.56	160.83	75.25	143.05	6.19	10.23	160.83	14.0703	0	0	52	0	52	0	0.0173333	0	0.0173333	0	0
PPO	Bortezomib	41.2	384.24	4	6	2	0.00520512	0.37	124.44	40.16	99.37	53	28	2	9	2	2	1	2.4	8.64	1.51	0.89	1.53	18.999	500	0	0.0532	-3.9	362.49	580.13	621.26	124.44	62.82	104.36	5.88	7.84	123.38	10.4997	0	0	52	0	52	0	0.0173333	0	0.0173333	0	0
PPO	Cyclosporin A	0	1202.6	5	12	7	0.00582067	0.79	278.8	127.97	327.14	196	85	12	15	1	0	1	-2.4	11.83	3.64	1.4	3.638	58.377	2330	0	0.027	-5.1	1218.56	2038.91	1386.56	278.8	148.81	259.61	9.45	11.71	278.8	33.3317	0	0	52	0	52	0	0.0173333	0	0.0173333	0	0
[truncated: 22 more columns]

## Sheet: Feature Legend
Term No.	Term	Definition/Calculation		Source(s)
1	Drug pi wt.%	(Sum of molecular weight of pi-groups / total drug mw) x 100		Calculated
2	Mw	Mw		Calculated
3	Hydrogen bond donor count	No. of Hbond donors		Chemicalize/ChemAxon
4	Hydrogen bond acceptor count	No. of Hbond acceptors		Chemicalize/ChemAxon
5	Net Drug Hbond Acceptors (Hbond acc - H bond donors)	Term 4 - Term 3		Calculated
6	Net Drug Hbond Acceptors-donors / Mw	(Term 4 - Term 3) / Mw (Term 2)		Calculated
7	FSP3	Fraction of sp3		Chemicalize/ChemAxon
8	Topological polar surface area	Topological polar surface area		Chemicalize/ChemAxon
9	Polarizability	Polarizability		Chemicalize/ChemAxon
10	Molar refractivity	Molar refractivity		Chemicalize/ChemAxon
11	Atom count	Atom count		Chemicalize/ChemAxon
12	Heavy atom count	Heavy atom count		Chemicalize/ChemAxon
13	Asymmetric atom count	Asymmetric atom count		Chemicalize/ChemAxon
14	Rotatable bond count	Rotatable bond count		Chemicalize/ChemAxon
15	Ring count	Ring count		Chemicalize/ChemAxon
16	Aromatic ring count	Aromatic ring count		Chemicalize/ChemAxon
17	Hetero ring count	Hetero ring count		Chemicalize/ChemAxon
18	pKa - Strongest Basic	pKa - Strongest Basic		Chemicalize/ChemAxon
19	pKa - Strongest Acid	pKa - Strongest Acid		Chemicalize/ChemAxon
20	Predicted Drug Log D (pH 7.4)(ChemAxon)	Predicted Drug Log D (pH 7.4)		Chemicalize/ChemAxon
21	Drug Log P	Drug Log P via pubchem or drugbank		PubChem and Drugbank
22	Drug Predicted Log P (Chemicalize)	Drug Predicted Log P		Chemicalize/ChemAxon
23	HLB	Hydrophilic-Lipophilic Balance		Chemicalize/ChemAxon
24	Complexity	Complexity		Chemicalize/ChemAxon
25	Physiological Charge (drugbank)	Physiological Charge		Drugbank
26	aqueous Solubility [mg/mL] (drugbank)	aqueous Solubility [mg/mL]		Drugbank
27	Log S (drug bank)	Log S		Drugbank
28	Van der Waals volume	Van der Waals volume		Chemicalize/ChemAxon
29	Van der Waals surface area	Van der Waals surface area		Chemicalize/ChemAxon
30	Solvent accessible surface area	Solvent accessible surface area		Chemicalize/ChemAxon
31	Minimum projection area	Minimum projection area		Chemicalize/ChemAxon
32	Maximum projection area	Maximum projection area		Chemicalize/ChemAxon
33	Minimum projection radius	Minimum projection radius		Chemicalize/ChemAxon
34	Maximum projection radius	Maximum projection radius		Chemicalize/ChemAxon
35	CMR	CLog P/MR		ChemDraw
36	Number of aromatic rings per polymer chain	Summation of aromatic groups in core forming (hydrophobic) polymer block		Calculated
37	Number of H bond donors per core-forming polymer block	Summation of H bond donors in core forming (hydrophobi)c polymer block		Calculated
38	Number of H bond acceptors per hydrophobic polymer block	Summation of H bond acceptors per (hydrophobic) core forming polymer		Calculated
39	No.of strong Hbond acceptors (e.g., tertiary amides) in core forming block	Sum of strong Hbond acceptors (e.g., amides, ketones, tertiary amides; pKBHX > 2) in core forming (hydrophobic) block.		Calculated / Abraham, J. Phys. Org. Chem. 1993, 6, 660; Laurence & Gal, Chem. Rev. 2010, 110, 543
40	No. of weak H bond acceptors in hydrophobic block	Sum of weak H bond acceptors (e.g., ether, esters; pKBHX < 2) in (hydrophobic) core forming block		Calculated / Abraham, J. Phys. Org. Chem. 1993, 6, 660; Laurence & Gal, Chem. Rev. 2010, 110, 543
41	N Hbond donors per hydrophobic block / hydrophobic block Mw	Term 37 / Mw		Calculated
42	N Hbond acc per hydrophobic block / hydrophobic block Mw	Term 38 / Mw		Calculated
43	No.of strong Hbond acceptors (e.g., tertiary amides) in hydrophobic block / Mw of hyd block	Term 39 / Mw		Calculated
44	No. of weak H bond acceptors (ethers/esters) in hydrophobic block / hyd block Mw	Term 40 / Mw		Calculated
45	polymer pi%	Molecular weight of aromatic moieties in core forming block / total Mw of core-forming polymer block		Calculated
46	pi interaction term (drug pi% x polymer pi%)	Term 1 x Term 45		Calculated
47	Hbond interaction term 1 (Net drug Hbond acc x polymer H bond donors)	Net drug Hbond Acceptors x No. of polymer H-donors (Term 5 x 37)		Calculated
48	Hbond interaction term 2 (No. drug Hbond donors x No. polymer H bond acceptor)	No. drug Hbond donors x No. Hbond acceptors in core forming polymer block (Term 3 x Term 38)		Calculated
49	Hbond interaction term 3 (No. drug Hbond donor x No. Strong H acceptors in core block)	No. of Hbond donors in drug vs No. of strong Hbond acceptors in core forming polymer block (Term 3 x 39)		Calculated
50	wt% S in core forming block	[(No. of sulfur in core forming block x Mw of S) / Mw of core forming block] x 100		Calculated
51	Core-forming block Predicted Log P (Log D 7.4)	Core-forming block Predicted Log P (Log D 7.4)		Chemicalize/ChemAxon
52	Corona-block (hydrophilic) block Log P	Hydrophilic block Log P		Chemicalize/ChemAxon
53	Corona-forming (hydrophilic) block HLB	Hydrophilic block HLB		Chemicalize/ChemAxon
54	Hydrophilic block Predicted Log P / total Mw	Corona-forming (hydrophilic) block Predicted Log P / total polymer (corona+core-forming blocks) Mw		Calculated
55	Corona-forming (Hydrophilic) block Log P / Hydrophilic block Mw	Corona-forming (hydrophilic) block Log P / corona-forming (hydrophilic) block Mw		Calculated
56	Core-forming (hydrophobic) block Predicted Log D (7.4) / total Mw	Core forming (hydrophobic) block predicted Log D (at 7.4) / tota polymer Mw (corona+core forming block Mw)		Calculated
57	Hydrophobic block Log P (Log D 7.4) / Hydrophobic block Mw	Core-forming (hydrophobic) block Log D at 7.4 / Core-forming (hydrophobic) block Mw		Calculated
58	Total Mw	Total (core+corona-forming blocks) Mw		Calculated
59	hydrophobic block Mw	hydrophobic block Mw via Chemicalize/ChemAxon		Calculated
60	hydrophilic block Mw	hydrophilic block Mw via Chemicalize/ChemAxon		Calculated
61	hydrophobic/hydrophilic block Mw	hydrophobic/hydrophilic block Mw via Chemicalize/ChemAxon		Calculated
62	No. of blocks	No. of blocks (e.g., di or triblock copolymers)		Calculated
63	Polymer core-forming (hydrophobic) block Tg	Polymer hydrophobic block Tg via Chemicalize/ChemAxon		Measured (for polysulfides) via DSC or Literature (PLA/PLGA/PPO/PPS)
64	Average Torsional Barrier per Rotatable Bond (backbone only)	#VALUE!		Calculated using estimated values derived from: Acc. Chem. Res. 1983, 16, 6, 207–210 J. Phys. Chem. A 2000, 104, 14, 3231–3238 Journal of Theoretical and Computational Chemistry 2009 08:01, 181-181 Int. J. Quantum Chem., 119, e25896.
		• C(sp³)–C(sp³) = 3.0 • C(sp³)–O(sp³) = 2.5 • C(sp³)–S(sp³) = 1.5 • C(sp³)–C(sp²) (α to C=O) = 5.0 • C(=O)–O (ester) = 12.0	• –C–C–S– (all the polysulfides) Bonds: 1×C–C, 2×C–S → (3.0 + 1.5 + 1.5)/3 = 2.00 • –C–C(=O)–O– (polyesters – PLA / PLGA) Bonds: 1×C(sp³)–C(sp²) (α to C=O), 1×C(=O)–O, 1×O–C(sp³) → (5.0 + 12.0 + 2.5)/3 = 6.50 • –O–C–C– (polyethers – PPO on pluronic) Bonds: 2×C–O, 1×C–C → (2.5 + 2.5 + 3.0)/3 = 2.67
65	Core-forming (hydrophobic) block Backbone mass % ( Mw of backbone / Side Chain Mw x 100)	[Mw of backbone / Summed Mw of sidechain(s)] x 100		Calculated
66	charge / polymer chain	charge / polymer chain		Calculated assuming typical charge of functional groups at pH 7.4
